# Supplementary material for: Novel Autism Subtype-Dependent Genetic Variants Are Revealed by Quantitative Trait and Subphenotype Association Analyses of Published GWAS Data
Source: PLoS One. 2011 Apr 27;6(4):e19067. doi: 10.1371/journal.pone.0019067 (PMC3083416; doi:10.1371/journal.pone.0019067)
Supplement: Table S2 — Quantitative trait loci associated with 5 ASD traits. Language-impairment, deficits in nonverbal communication, impaired play skills, insistence on sameness and rituals, and delayed social development. (XLS) [file pone.0019067.s006.xls]

## Sheet: Sheet1
Table S2. Quantitative trait loci (QTL) associated with 5 ASD traits
SNP	SNP position	Band	Location	Gene	Alleles	AA change (position)	UNADJ P	Trait
rs12407665	chr1:14070302	1p36.21	CNV*		C/G/T		4.159e-07	Language impairment
rs17828521	chr6:54328202	6p12.1	Intron	TINAG	C/T		7.459e-07	Language impairment
rs9474831	chr6:54361040	6p12.1	Intron	TINAG	C/T		1.088e-06	Language impairment
rs6454792	chr6:90743794	6q15	Intron	BACH2	A/G		1.406e-06	Language impairment
rs10183984	chr2:167181162	2q24.3	CNV		A/G		2.822e-06	Language impairment
rs11969265	chr6:90739765	6q15	Intron	BACH2	C/T		3.032e-06	Language impairment
rs1231339	chr9:25730863	9p21.2	CNV		A/C		3.195e-06	Language impairment
rs10806416	chr6:90755541	6q15	Intron	BACH2	C/T		3.376e-06	Language impairment
rs7785107	chr7:10247968	7p21.3	CNV		G/T		4.576e-06	Language impairment
rs2277049	chr5:147883281	5q33.1	Intron	HTR4	A/C		5.054e-06	Language impairment
rs757099	chr9:25727567	9p21.2	CNV		C/T		6.204e-06	Language impairment
rs7725785	chr5:147882896	5q33.1	Intron (boundary)	HTR4	A/C		6.38e-06	Language impairment
rs758158	chr12:1895465	12p13.33	Intron	CACNA2D4	A/G		6.69e-06	Language impairment
rs2287581	chr5:31341022	5p13.3	Intron (boundary)	CDH6	A/G		6.756e-06	Language impairment
rs17830215	chr8:1902159	8p23.3	Promoter	KBTBD11	C/T		7.649e-06	Language impairment
rs2180055	chr22:47722427	22q13.32	CNV		C/T		8.066e-06	Language impairment
rs12893752	chr14:25220350	14q12	CNV		C/T		8.737e-06	Language impairment
rs9941626	chr2:212059912	2q34	Intron	ERBB4	G/T		4.883e-07	Nonverbal deficits
rs13205238	chr6:413597	6p25.3	CNV		A/G		9.425e-07	Nonverbal deficits
rs11671930	chr19:8023308	19p13.2	Promoter	CCL25	C/T		1.245e-06	Nonverbal deficits
rs11229410	chr11:57926867	11q12.1	Coding exon	OR5B3	C/T	I/V (198)	1.323e-06	Nonverbal deficits
rs11229413	chr11:57927314	11q12.1	Coding exon	OR5B3	A/G	W/R (49)	2.065e-06	Nonverbal deficits
rs11229411	chr11:57926918	11q12.1	Coding exon	OR5B3	C/T	A/T (181)	2.349e-06	Nonverbal deficits
rs11721070	chr3:72004997	3p13	CNV		C/T		2.552e-06	Nonverbal deficits
rs12466917	chr2:207427129	2q33.3	-		A/G		2.78e-06	Nonverbal deficits
rs13076171	chr3:71988841	3p13	CNV		A/G		3.12e-06	Nonverbal deficits
rs7930778	chr11:57792932	11q12.1	Promoter	OR10W1	C/T		4.085e-06	Nonverbal deficits
rs12962411	chr18:27645521	18q12.1	CNV		A/G		4.114e-06	Nonverbal deficits
rs12279895	chr11:57926572	11q12.1	Coding exon	OR5B3	C/T	K/R (296)	4.531e-06	Nonverbal deficits
rs730168	chr16:73707776	16q23.1	Intron	LDHD	A/G		4.625e-06	Nonverbal deficits
rs13021324	chr2:212058490	2q34	Intron	ERBB4	C/T		4.758e-06	Nonverbal deficits
rs564127	chr7:79734155	7q21.11	CNV		C/T		5.144e-06	Nonverbal deficits
rs1231339	chr9:25730863	9p21.2	CNV		A/C		5.778e-06	Nonverbal deficits
rs393076	chr3:162584791	3q26.1	CNV		A/G		5.991e-06	Nonverbal deficits
rs1938651	chr11:57869527	11q12.1	CNV		C/T		6e-06	Nonverbal deficits
rs11138895	chr9:82693023	9q21.31	-		A/C		6.213e-06	Nonverbal deficits
rs1938672	chr11:57885629	11q12.1	Promoter	OR5B17	C/T		6.29e-06	Nonverbal deficits
rs4804202	chr19:12579619	19p13.2	Promoter	FLJ90396	C/T		6.956e-06	Nonverbal deficits
rs665036	chr1:61053139	1p31.3	CNV		C/T		8.066e-06	Nonverbal deficits
rs4527692	chr6:21268426	6p22.3	Intron	CDKAL1	C/T		8.082e-06	Nonverbal deficits
rs519514	chr7:78294084	7q21.11	Intron	MAGI2	C/T		8.445e-06	Nonverbal deficits
rs3133855	chr11:120090061	11q23.3	Intron	GRIK4	A/G		9.914e-06	Nonverbal deficits
rs1938670	chr11:57884219	11q12.1	Promoter	OR5B17	A/G		9.951e-06	Nonverbal deficits
rs13205238	chr6:413597	6p25.3	CNV		A/G		5.455e-08	Play skills
rs1996893	chr9:14880268	9p22.3	Intron	FREM1	C/T		1.444e-07	Play skills
rs12606567	chr18:48408860	18q21.2	Intron	DCC	C/T		5.585e-07	Play skills
rs3769845	chr2:230863948	2q37.1	Intron	SP140	C/T		6.188e-07	Play skills
rs2422675	chr20:1940396	20p13	CNV		A/G		9.81e-07	Play skills
rs4798405	chr18:5732206	18p11.31	CNV		A/G		1.015e-06	Play skills
rs10040891	chr5:2166288	5p15.33	CNV		C/T		1.158e-06	Play skills
rs8181738	chr12:23095146	12p12.1	-		G/T		1.209e-06	Play skills
rs11950809	chr5:2166672	5p15.33	CNV		A/C		1.477e-06	Play skills
rs11627027	chr14:93440170	14q32.13	-		C/T		1.518e-06	Play skills
rs1930	chr2:80368183	2p12	Intron	CTNNA2	C/T		1.56e-06	Play skills
rs4894734	chr3:177013204	3q26.31	Downstream	NAALADL2	A/C		1.6e-06	Play skills
rs1482930	chr15:79651018	15q25.2	CNV		A/G		2.212e-06	Play skills
rs11671930	chr19:8023308	19p13.2	Promoter	CCL25	C/T		2.32e-06	Play skills
rs4980777	chr11:68927459	11q13.2	CNV		A/G		2.349e-06	Play skills
rs1481513	chr8:79171163	8q21.12	CNV		C/T		2.449e-06	Play skills
rs10987251	chr9:128142815	9q33.3	Intron (boundary)	C9orf28	A/G		2.542e-06	Play skills
rs2151206	chr9:14844072	9p22.3	Intron	FREM1	A/G		2.55e-06	Play skills
rs2044747	chr14:42393956	14q21.2	CNV		G/T		2.576e-06	Play skills
rs1440423	chr5:34425616	5p13.2	CNV		C/T		2.975e-06	Play skills
rs4745257	chr9:75582705	9q21.13	CNV		A/C		3.057e-06	Play skills
rs2779499	chr9:14840816	9p22.3	Intron	FREM1	C/T		3.251e-06	Play skills
rs1796028	chr2:96982680	2q11.2	CNV		A/G		3.474e-06	Play skills
rs1888156	chr9:128142661	9q33.3	Coding exon	C9orf28	A/G	T/T (45)	3.522e-06	Play skills
rs6734788	chr2:208801314	2q33.3	Downstream	IDH1	C/T		3.611e-06	Play skills
rs7605424	chr2:80155080	2p12	Intron	CTNNA2	A/G		3.711e-06	Play skills
rs4627775	chr3:106308609	3q13.11	-		G/T		3.754e-06	Play skills
rs5009527	chr4:184601958	4q35.1	Promoter	CARF	C/T		3.876e-06	Play skills
rs1796045	chr2:96986737	2q11.2	CNV		C/T		4.054e-06	Play skills
rs1863080	chr2:36379940	2p22.3	CNV		A/C		4.256e-06	Play skills
rs7337921	chr13:23381053	13q12.12	Intron	FLJ46358	A/G		4.27e-06	Play skills
rs6452136	chr5:23722770	5p14.2	-		C/T		4.416e-06	Play skills
rs2168709	chr18:56096085	18q21.32	CNV		C/T		4.42e-06	Play skills
rs4386512	chr3:177012791	3q26.31	Downstream	NAALADL2	C/T		4.53e-06	Play skills
rs12614870	chr2:126505161	2q14.3	CNV		A/G		4.543e-06	Play skills
rs10491885	chr9:28507137	9p21.1	Intron	LRRN6C	C/T		4.577e-06	Play skills
rs4646421	chr15:72803245	15q24.1	Intron	CYP1A1	C/T		4.991e-06	Play skills
rs4894733	chr3:177013074	3q26.31	Downstream	NAALADL2	G/T		5.104e-06	Play skills
rs7944323	chr11:78903676	11q14.1	CNV		G/T		5.258e-06	Play skills
rs6791089	chr3:176998117	3q26.31	Intron	NAALADL2	A/C		5.445e-06	Play skills
rs11229410	chr11:57926867	11q12.1	Coding exon	OR5B3	C/T	I/V (198)	5.514e-06	Play skills
rs17770167	chr5:129679109	5q23.3	CNV		A/G		5.591e-06	Play skills
rs6698676	chr1:84528583	1p31.1	Promoter	SAMD13	G/T		5.762e-06	Play skills
rs11664663	chr18:44397104	18q21.1	Intron	KIAA0427	C/T		5.789e-06	Play skills
rs6482516	chr10:18879356	10p12.33	Intron	NSUN6	A/G		5.789e-06	Play skills
rs11082277	chr18:38304361	18q12.3	CNV		A/G		5.995e-06	Play skills
rs6988293	chr8:121303479	8q24.12	Intron	COL14A1	A/G		5.999e-06	Play skills
rs6974649	chr7:130463637	7q32.3	CNV		A/C		6.108e-06	Play skills
rs730168	chr16:73707776	16q23.1	Intron	LDHD	A/G		6.512e-06	Play skills
rs1461710	chr18:38197191	18q12.3	CNV		A/G		6.672e-06	Play skills
rs9941626	chr2:212059912	2q34	Intron	ERBB4	G/T		7.031e-06	Play skills
rs3745651	chr19:12553001	19p13.2	Coding exon	ZNF490	C/T	H/H (296)	7.492e-06	Play skills
rs9536962	chr13:54576937	13q21.1	CNV		A/G		7.659e-06	Play skills
rs7529505	chr1:99135144	1p21.3	Intron	PAP2D	C/T		7.74e-06	Play skills
rs9342127	chr6:88633834	6q15	-		A/G		8.028e-06	Play skills
rs1554547	chr12:97892279	12q23.1	Intron	ANKS1B	A/G		8.24e-06	Play skills
rs9508456	chr13:28914362	13q12.3	Intron	KIAA0774	C/T		8.404e-06	Play skills
rs2078520	chr2:80246156	2p12	Intron	CTNNA2	A/G		8.469e-06	Play skills
rs9569991	chr13:33121745	13q13.2	-		A/G		8.699e-06	Play skills
rs3825597	chr14:51488595	14q22.1	Intron	GNG2	A/G		8.799e-06	Play skills
rs3754741	chr2:173761465	2q31.1	Intron	ZAK	C/T		9.36e-06	Play skills
rs2250595	chr12:45642394	12q13.11	-		A/G		9.643e-06	Play skills
rs1055518	chr10:73177651	10q22.1	3' UTR	C10orf54	A/G		9.722e-06	Play skills
rs2600685	chr2:175335294	2q31.1	Intron	CHRNA1	A/G		9.986e-06	Play skills
rs164187	chr1:160615261	1q23.3	Promoter	C1orf111	C/T		1.612e-07	Sameness-rituals
rs3809854	chr17:42384293	17q21.32	CNV		C/T		6.28e-07	Sameness-rituals
rs3804967	chr3:7479914	3p26.1	Intron	GRM7	A/G		1.114e-06	Sameness-rituals
rs3804968	chr3:7477700	3p26.1	Intron	GRM7	A/G		1.896e-06	Sameness-rituals
rs317985	chr5:66773558	5q13.1	CNV		A/G		2.239e-06	Sameness-rituals
rs9634811	chr13:47362176	13q14.2	-		A/G		2.393e-06	Sameness-rituals
rs7819605	chr8:67423026	8q13.1	CNV		A/G		2.676e-06	Sameness-rituals
rs7950390	chr11:4587928	11p15.4	Promoter	TRIM68	G/T		2.868e-06	Sameness-rituals
rs4436186	chr9:72323371	9q21.11	CNV		A/G		2.999e-06	Sameness-rituals
rs4838964	chr1:113094181	1p13.2	CNV		A/G		3.265e-06	Sameness-rituals
rs1827924	chr2:228377979	2q36.3	Promoter	CCL20	A/G		3.32e-06	Sameness-rituals
rs7699496	chr4:43931165	4p13	Intron	KCTD8	A/G		3.589e-06	Sameness-rituals
rs3861787	chr11:4604346	11p15.4	CNV		G/T		4.077e-06	Sameness-rituals
rs6782718	chr3:7462776	3p26.1	Intron	GRM7	A/G		4.642e-06	Sameness-rituals
rs11038286	chr11:45032402	11p11.2	CNV		A/G		4.707e-06	Sameness-rituals
rs693442	chr13:100725498	13q33.1	Intron	VGCNL1	A/G		4.742e-06	Sameness-rituals
rs1452885	chr12:43231117	12q12	Intron	NELL2	A/G		5.211e-06	Sameness-rituals
rs17599556	chr4:44013295	4p13	Intron	KCTD8	A/C		5.275e-06	Sameness-rituals
rs185425	chr5:57665978	5q11.2	CNV		C/T		5.401e-06	Sameness-rituals
rs11035240	chr11:39332276	11p12	CNV		C/T		5.556e-06	Sameness-rituals
rs9693369	chr8:138599449	8q24.23	-		C/T		6.251e-06	Sameness-rituals
rs10781238	chr9:76384432	9q21.13	Intron	RORB	C/T		6.331e-06	Sameness-rituals
rs9568011	chr13:47606812	13q14.2	-		C/T		7.208e-06	Sameness-rituals
rs11682846	chr2:156716949	2q24.1	CNV		C/T		7.53e-06	Sameness-rituals
rs7650071	chr3:137459995	3q22.3	Intron	PCCB	A/G		7.788e-06	Sameness-rituals
rs2574852	chr17:73003467	17q25.3	Intron	SEPT9	A/G		8.137e-06	Sameness-rituals
rs11914753	chr3:173791734	3q26.31	CNV		C/T		8.161e-06	Sameness-rituals
rs2469183	chr15:84992924	15q25.3	CNV		G/T		8.214e-06	Sameness-rituals
rs274646	chr5:6841282	5p15.31	CNV		C/T		8.299e-06	Sameness-rituals
rs13096022	chr3:7465129	3p26.1	Intron	GRM7	A/G		8.756e-06	Sameness-rituals
rs17738966	chr14:54371969	14q22.2	Downstream	GCH1	A/G		9.006e-06	Sameness-rituals
rs6461176	chr7:15453420	7p21.1	Intron	FLJ16237	A/C		9.057e-06	Sameness-rituals
rs13205238	chr6:413597	6p25.3	CNV		A/G		1.189e-10	Social development
rs11138895	chr9:82693023	9q21.31	CNV		A/C		3.918e-07	Social development
rs4809918	chr20:50734607	20q13.2	-		A/G		4.883e-07	Social development
rs9479482	chr6:150399705	6q25.1	-		C/T		6.678e-07	Social development
rs1294264	chr1:231548273	1q42.2	Intron	KIAA1804	C/T		9.593e-07	Social development
rs10788819	chr1:150161717	1q21.3	-		C/T		1.073e-06	Social development
rs4959923	chr6:412773	6p25.3	CNV		A/G		1.208e-06	Social development
rs4905110	chr14:93432083	14q32.13	-		A/G		1.213e-06	Social development
rs721087	chr2:4942340	2p25.2	CNV		C/T		1.303e-06	Social development
rs12266938	chr10:3852940	10p15.1	CNV		C/T		1.497e-06	Social development
rs10874468	chr2:96959718	2q11.2	CNV		A/G		1.663e-06	Social development
rs13384439	chr2:187500106	2q32.1	CNV		A/G		2.108e-06	Social development
rs4416176	chr2:26536150	2p23.3	Intron	OTOF	C/T		2.18e-06	Social development
rs10519124	chr2:67819501	2p14	-		A/G		2.217e-06	Social development
rs12962411	chr18:27645521	18q12.1	CNV		A/G		2.261e-06	Social development
rs6022029	chr20:50708572	20q13.2	CNV		A/G		2.319e-06	Social development
rs11627027	chr14:93440170	14q32.13	-		C/T		2.466e-06	Social development
rs6022039	chr20:50726331	20q13.2	CNV		C/T		2.976e-06	Social development
rs10886048	chr10:118928872	10q25.3	CNV		C/T		3.851e-06	Social development
rs4873815	chr8:144796206	8q24.3	Promoter	ZNF623	C/T		4.308e-06	Social development
rs4832481	chr2:16986218	2p24.3	CNV		A/C		4.476e-06	Social development
rs3809282	chr12:110192180	12q24.11	Intron	CUTL2	A/G		4.548e-06	Social development
rs1554547	chr12:97892279	12q23.1	Intron	ANKS1B	A/G		4.56e-06	Social development
rs2297172	chr9:71563166	9q21.11	Intron	PTAR1	C/T		4.57e-06	Social development
rs2255313	chr12:102773924	12q23.3	CNV		C/T		4.602e-06	Social development
rs2627468	chr8:3812607	8p23.2	Intron	CSMD1	C/T		4.874e-06	Social development
rs12183587	chr6:150396301	6q25.1	-		G/T		5.769e-06	Social development
rs10305860	chr4:148625337	4q31.23	Intron	EDNRA	A/G		5.909e-06	Social development
rs30746	chr5:135366157	5q31.1	CNV		A/G		6.104e-06	Social development
rs11138885	chr9:82678684	9q21.31	-		C/T		6.577e-06	Social development
rs1294293	chr1:231536935	1q42.2	Intron	KIAA1804	A/C		6.687e-06	Social development
rs12115722	chr9:133418328	9q34.13	CNV		G/T		6.936e-06	Social development
rs6698676	chr1:84528583	1p31.1	Promoter	SAMD13	G/T		7.873e-06	Social development
rs10997162	chr10:67906707	10q21.3	Intron	CTNNA3	G/T		7.934e-06	Social development
rs4646421	chr15:72803245	15q24.1	Intron	CYP1A1	C/T		8.119e-06	Social development
rs4778640	chr15:79391186	15q25.1	Downstream	STARD5	A/G		8.25e-06	Social development
rs10110252	chr8:17424455	8p22	CNV		C/T		8.555e-06	Social development
rs1996893	chr9:14880268	9p22.3	Intron	FREM1	C/T		8.59e-06	Social development
rs12811136	chr12:131603653	12q24.33	CNV		C/T		9.182e-06	Social development
rs17192980	chr5:7030768	5p15.31	CNV		C/T		9.292e-06	Social development
rs4811895	chr20:55639715	20q13.31	-		A/G		9.452e-06	Social development
rs2519866	chr17:27859883	17q11.2	Intron	MYO1D	A/G		9.579e-06	Social development
rs2779499	chr9:14840816	9p22.3	Intron	FREM1	C/T		9.589e-06	Social development
rs2151206	chr9:14844072	9p22.3	Intron	FREM1	A/G		9.881e-06	Social development
*CNV located in chromosomal band as reported by Pinto et al. [15]
